# Supplementary material for: Understanding Age-Related Longitudinal Dynamics in Abundance and Diversity of Dominant Culturable Gut Lactic Acid Bacteria in Pastured Goats
Source: MDPI journal article supplement (doi:10.3390/ani13162669), 2023-08-19
Supplement: s1 [file s1]

Supplementary Table S2: Primers used in the study

| Primers                | Primer sequence           | Fragment size | Ref |
|------------------------|---------------------------|---------------|-----|
|                        |                           |               |     |
| qPCR primers F         | 5-AGCAGTAGGGAATCTTCCA-3   | 341           | 36  |
| qPCR primer R5         | 5-CACCGCTACACATGGAG-3     |               |     |
| Sequencing primer 9f   | 5-GAGTTTGATCCTGGCTCAGGA-3 | 676           | 41  |
| Sequencing primer 685r | 5 -TCTACGCATTTACCGCTAC-3  |               |     |
| M13 RAPD primer        | 5-GAGGGTGGCGGTTCT-3       | -             | 37  |
|                        |                           |               |     |
