# Supplementary material for: Understanding Age-Related Longitudinal Dynamics in Abundance and Diversity of Dominant Culturable Gut Lactic Acid Bacteria in Pastured Goats
Source: MDPI journal article supplement (doi:10.3390/ani13162669), 2023-08-19
Supplement: s1 [file s1]

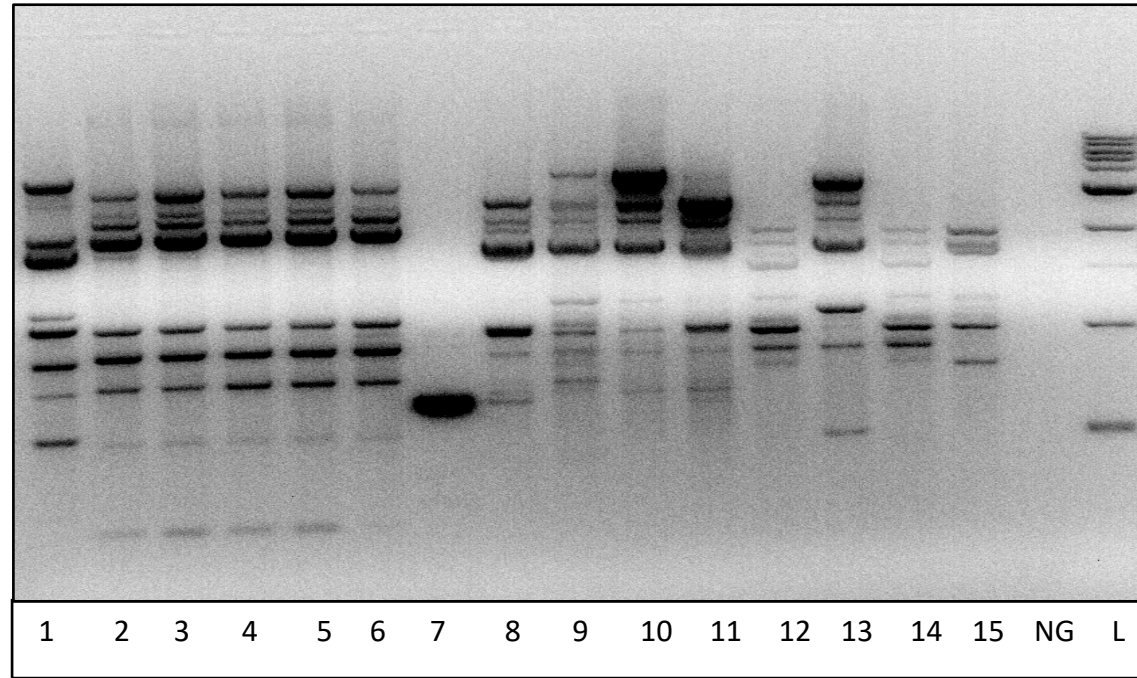

**Supplementary Figure S1** : Example of M-13 primer generated RAPD PCR profiles of LAB isolates from goats and used to differentiate genotypes and select isolates for sequencing. 2-6 similar profiles (same genotype), 1(highly similar to 2-6 but with unique bands), 7,9,10,13, 15-unique genotypes, 8,11-similar profiles (same genotypes), and 12,14-similar profiles (same genotype). L-1kb ladder (*NEW ENGLAND BioLabs*® Inc).

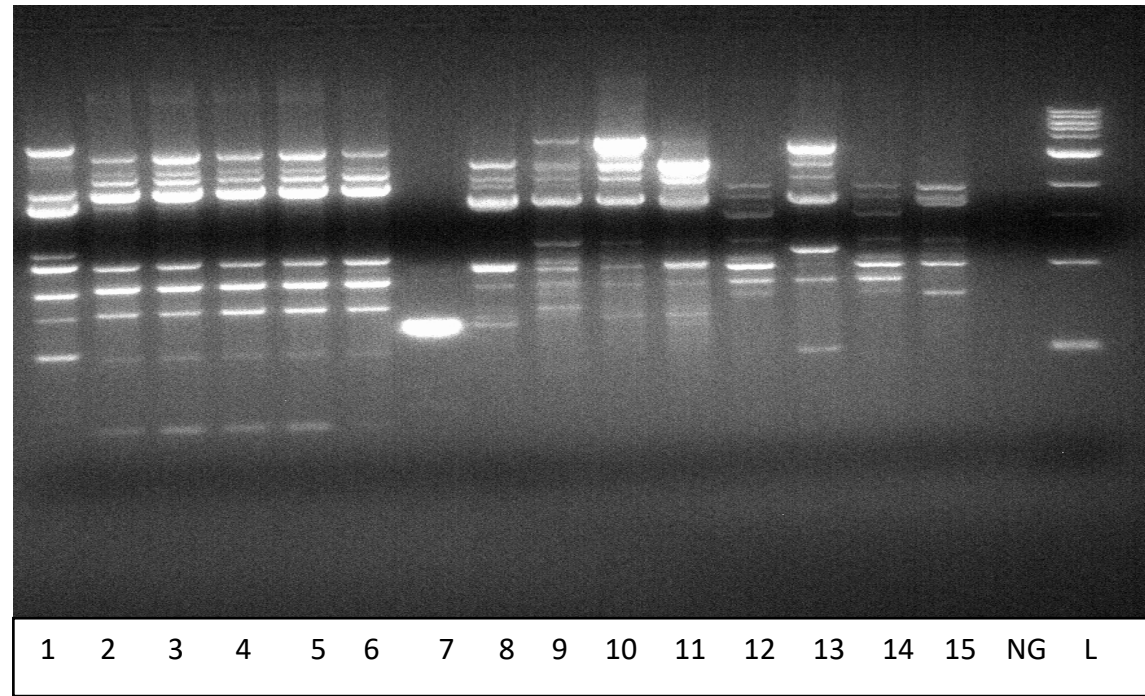

**Supplementary Figure S1:** Example of M-13 primer generated RAPD PCR profiles of LAB isolates from goats and used to differentiate genotypes and select isolates for sequencing. 2-6 similar profiles (same genotype), 1(highly similar to 2-6 but with unique bands), 7,9,10,13, 15-unique, 8,11-similar profiles (same genotypes), and 12,14-similar profiles (same genotype). L-1kb ladder (*NEW ENGLAND BioLabs®* Inc).
